# Supplementary material
Source: PubMed Central journal article supplement (PMC5847468)
Supplement: NIHMS928075-supplement-7.pdf [file NIHMS928075-supplement-7.pdf]

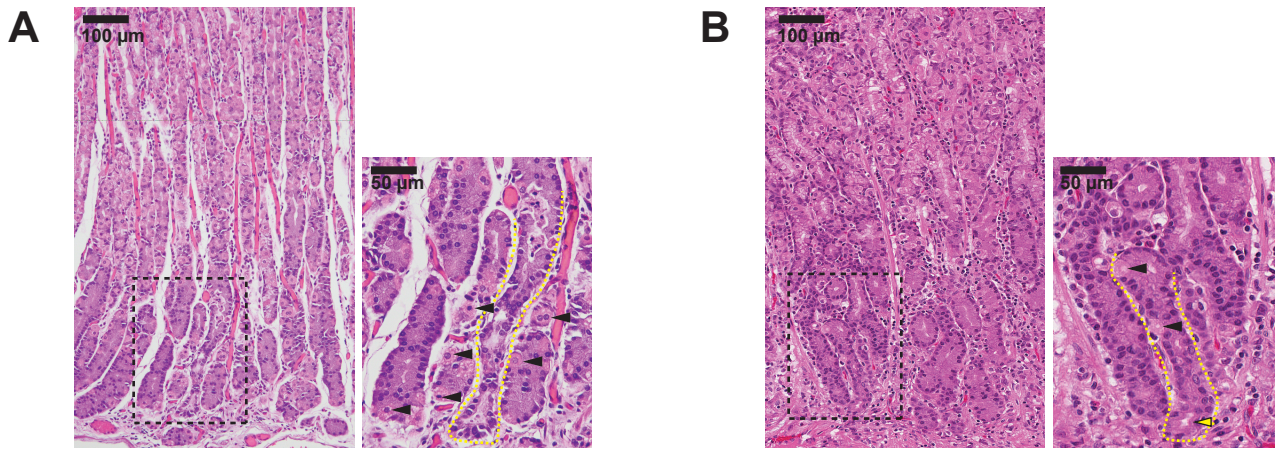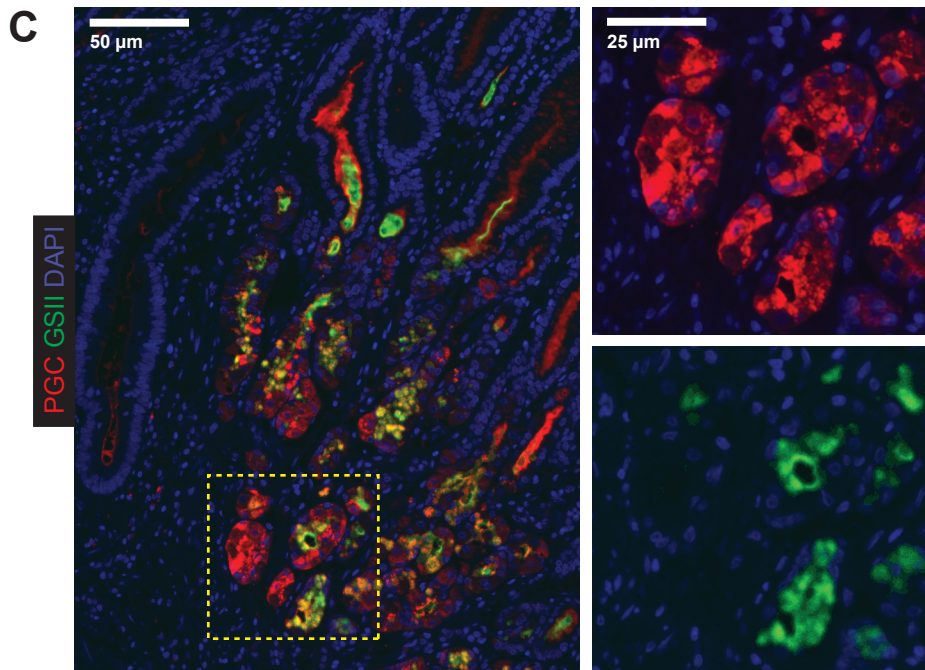

**E**

| Age | Sex | Race  | Pathological Diagnosis                            |
|-----|-----|-------|---------------------------------------------------|
| 55  | M   | AA    | Adenocarcinoma                                    |
| 57  | F   | Asian | Moderately differentiated adenocarcinoma          |
| 68  | M   | AA    | Moderately differentiated adenocarcinoma          |
| 75  | M   | White | Moderately differentiated adenocarcinoma          |
| 68  | M   | White | Poorly differentiated adenocarcinoma              |
| 73  | F   | White | Poorly differentiated adenocarcinoma              |
| 74  | F   | White | Metastatic adenocarcinoma                         |
| 61  | M   | White | Mucinous adenocarcinoma with signet ring features |
| 69  | M   | Asian | Mucinous adenocarcinoma with signet ring features |
| 66  | M   | White | Adenocarcinoma, signet ring cell                  |
