# Supplementary material
Source: PubMed Central journal article supplement (PMC5847468)

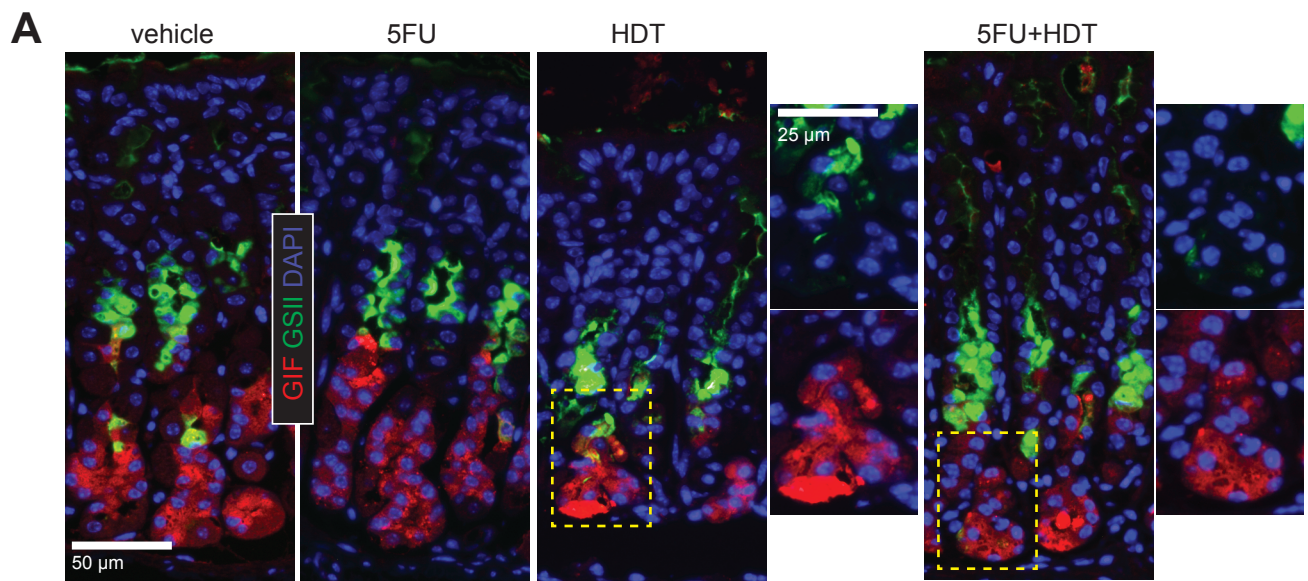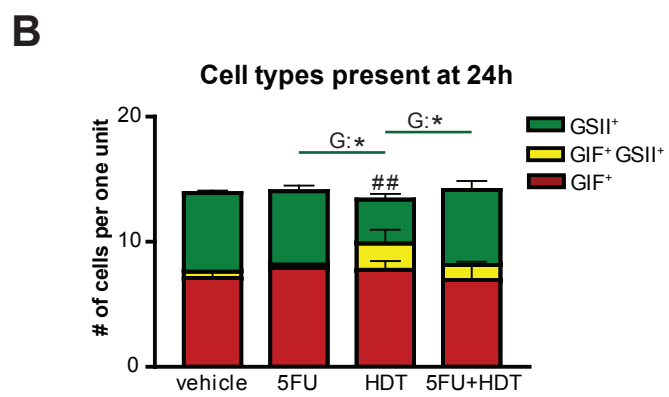

Supplement: NIHMS928075-supplement-2.pdf [file NIHMS928075-supplement-2.pdf]

**A**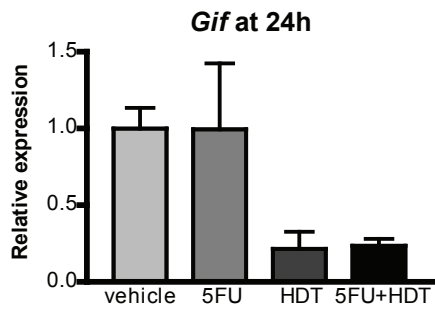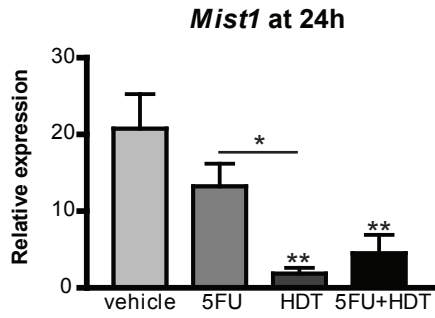**B**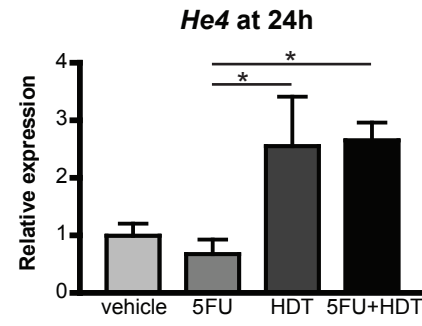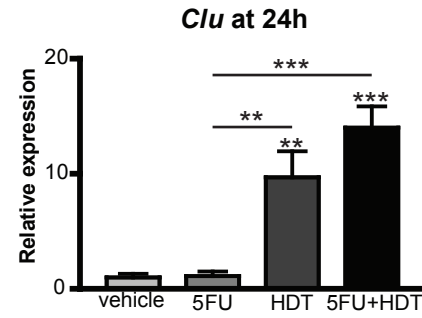**C**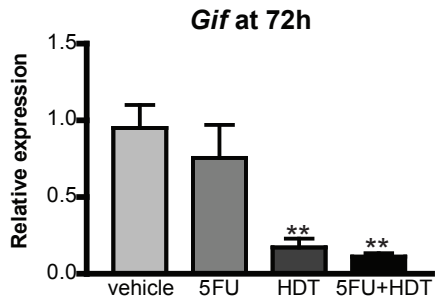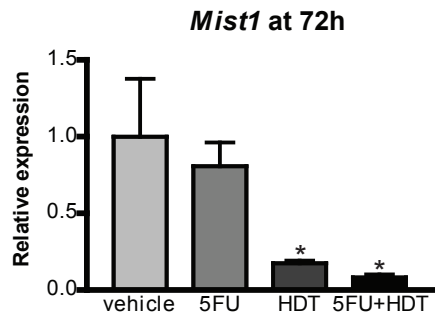**D**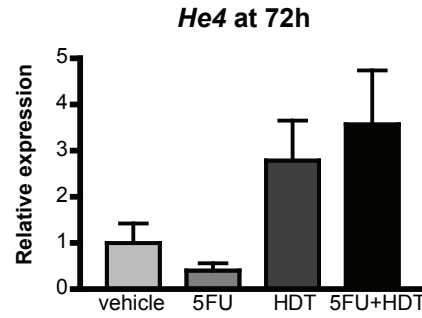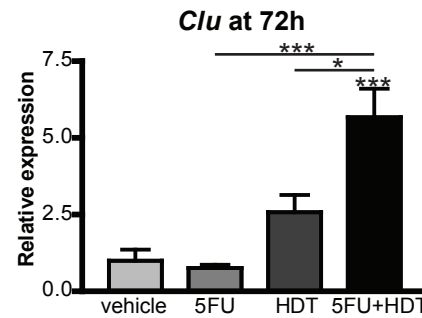

Supplement: NIHMS928075-supplement-3.pdf [file NIHMS928075-supplement-3.pdf]

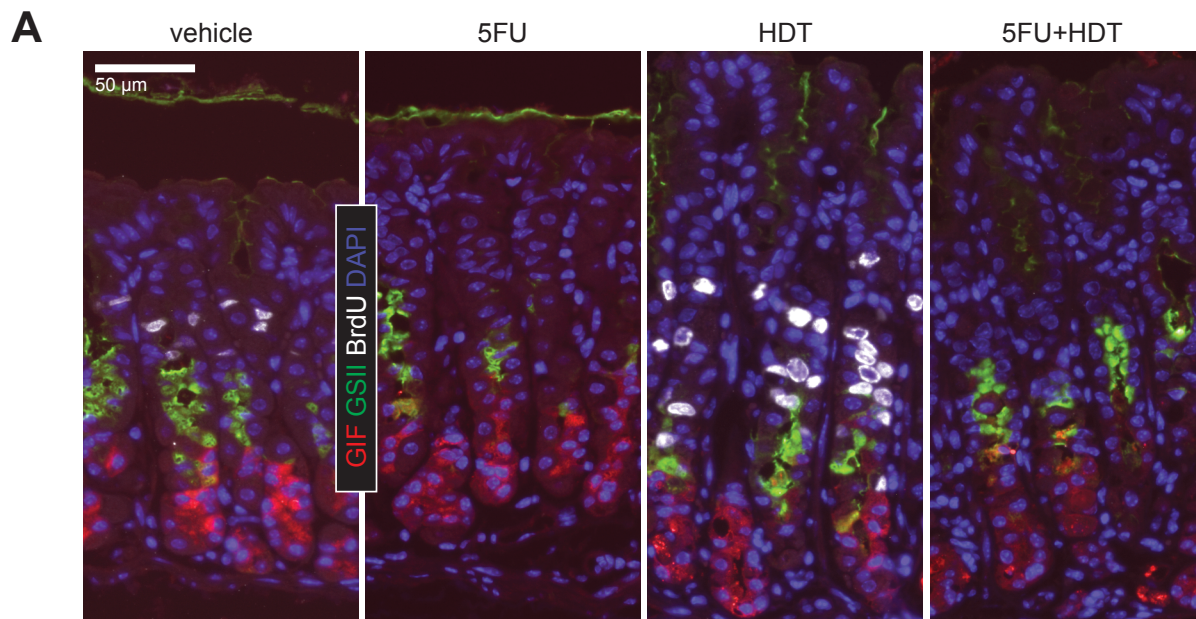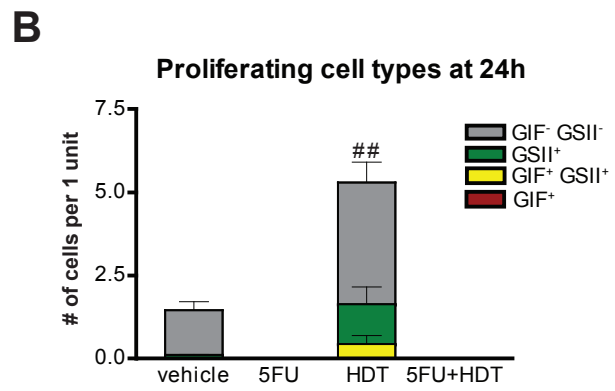

Supplement: NIHMS928075-supplement-4.pdf [file NIHMS928075-supplement-4.pdf]

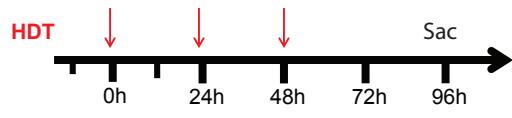

96h HDT

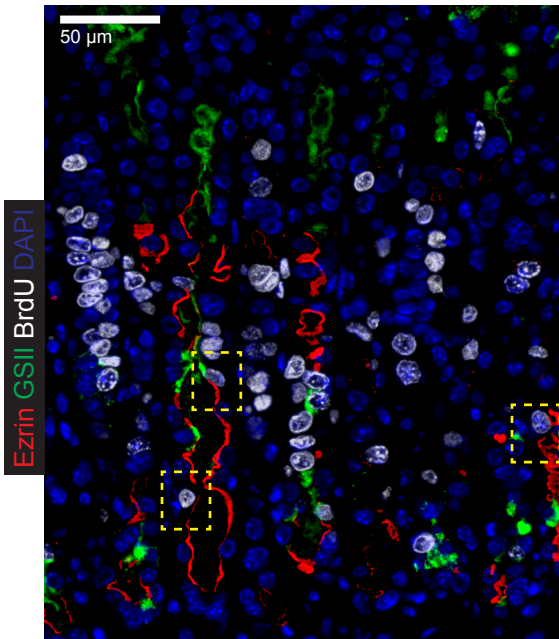

Ezrin GSII BrdU DAPI

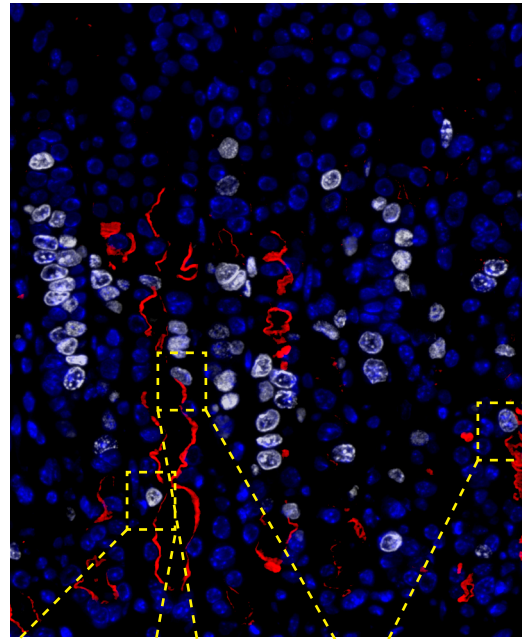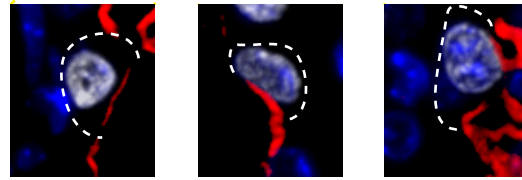

15 μm

Supplement: NIHMS928075-supplement-5.pdf [file NIHMS928075-supplement-5.pdf]

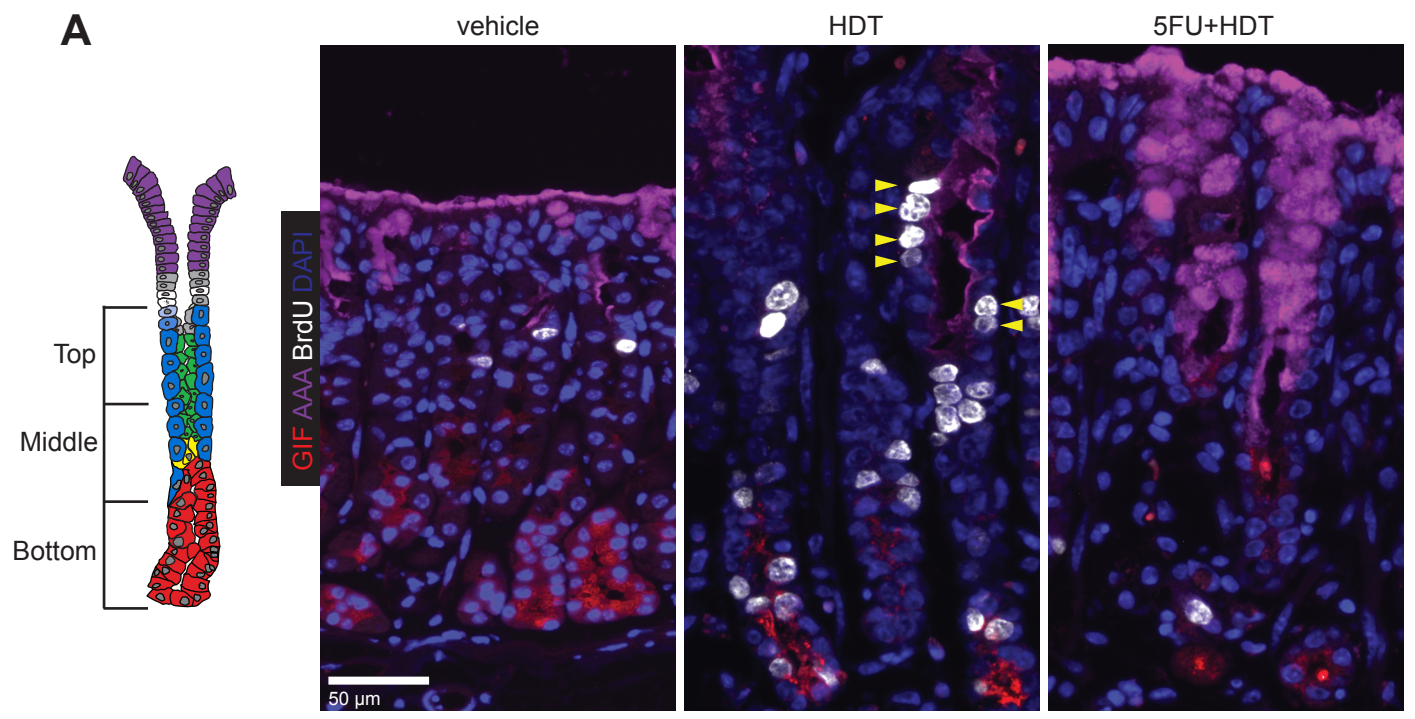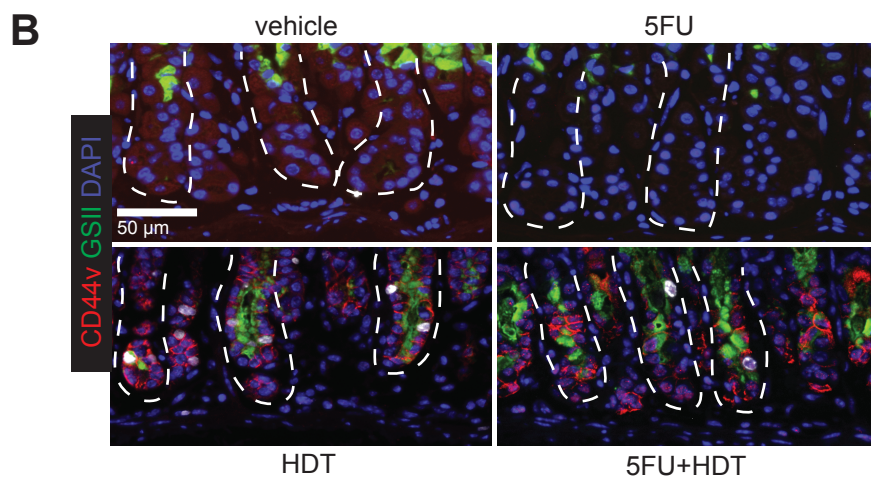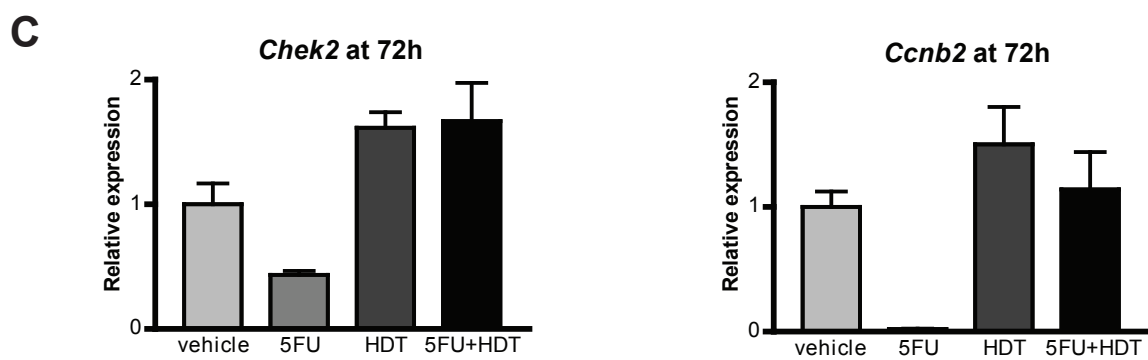

Supplement: NIHMS928075-supplement-6.pdf [file NIHMS928075-supplement-6.pdf]
